# Supplementary material
Source: PubMed Central journal article supplement (PMC8542566)
Supplement: NIHMS1710195-supplement-1.pdf [file NIHMS1710195-supplement-1.pdf]

## Supplemental Materials

*Toxoplasma gondii* serine hydrolases regulate parasite lipid mobilization during growth and replication within the host

Ouma Onguka<sup>1</sup>, Brett M. Babin<sup>1</sup>, Markus Lakemeyer<sup>1</sup>, Ian T. Foe<sup>1</sup>, Neri Amara<sup>1</sup>, Stephanie M. Terrell<sup>1,4</sup>, Kenneth M. Lum<sup>2</sup>, Piotr Cieplak<sup>3</sup>, Micah J. Niphakis<sup>2</sup>, Jonathan Z. Long<sup>1,4</sup>, and Matthew Bogyo<sup>1,5</sup>

<sup>1</sup>Department of Pathology, Stanford University School of Medicine, Stanford, CA 94305, USA

<sup>2</sup>Lundbeck La Jolla Research Center, San Diego, CA 92121, USA

<sup>3</sup>Infectious & Inflammatory Disease Center, Sanford Burnham Prebys Medical Discovery Institute, La Jolla, CA 92037, USA

<sup>4</sup>Stanford ChEM-H, Stanford University, Stanford, CA 94305, USA

<sup>5</sup>Department of Microbiology and Immunology, Stanford University, Stanford, CA 94305, USA

A

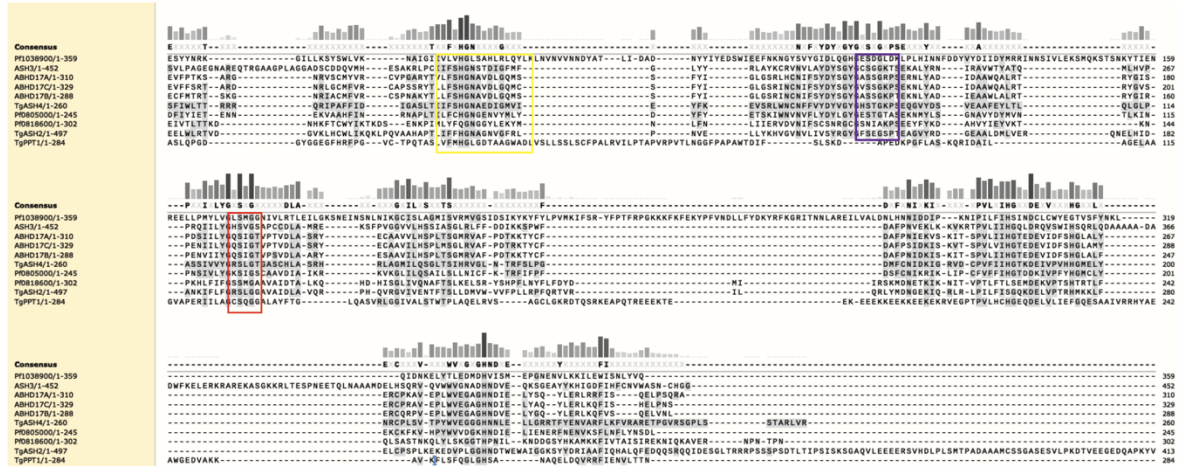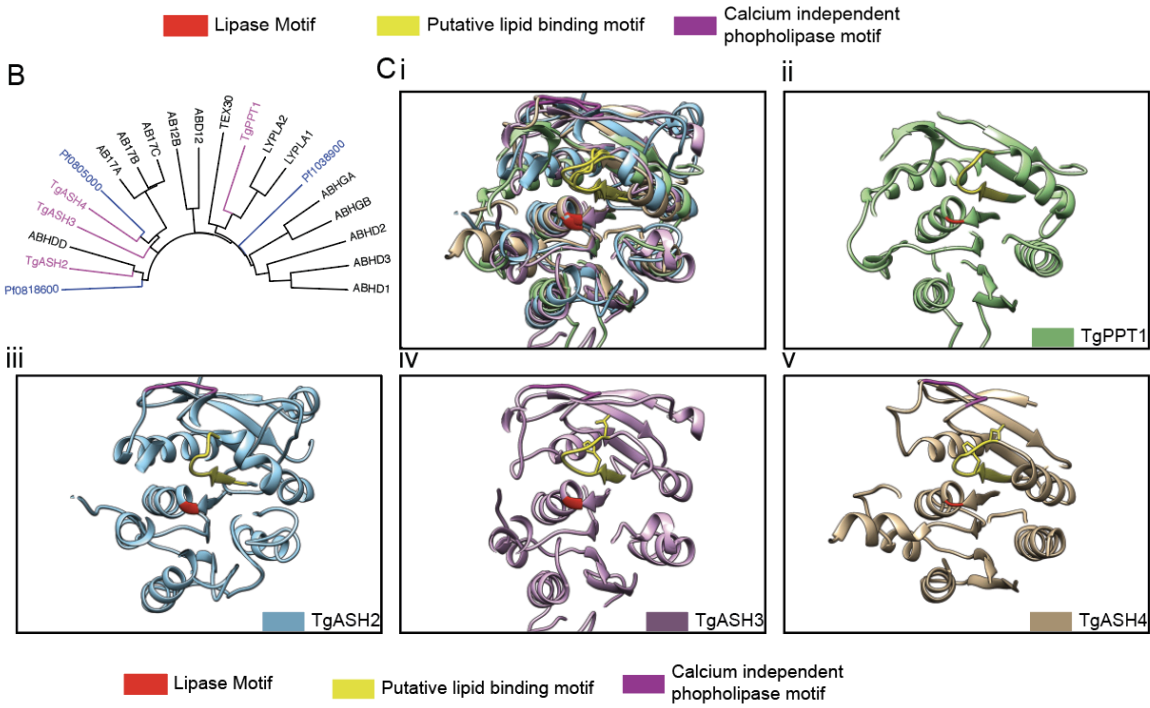

**Supplemental Figure 1. Sequence analysis of *T. gondii* and *P. falciparum* serine hydrolases (related to Figure 1)** (A) Sequence alignment of *Toxoplasma gondii* and *Plasmodium falciparum* serine hydrolases using Clustal Omega. Identical and highly similar residues are indicated within the conserved lipase motif (red), putative lipid binding domain (yellow) and calcium independent phospholipase motif (magenta). (B) Dendrogram of human, *T. gondii* and *P. falciparum* serine hydrolases showing the clustering in relation to human serine hydrolases (C). PyMOL structural modeling of *T. gondii* serine hydrolases using template structures (Table S1). The conserved lipase motif (red), putative lipid binding domain (yellow) and calcium independent phospholipase motif (purple) are highlighted. Images of (i) overlay of *TgPPT1* and *TgASH2-4* (ii) *TgPPT1* (iii) *TgASH2* (iv) *TgASH3* and (v) *TgASH4* homology models

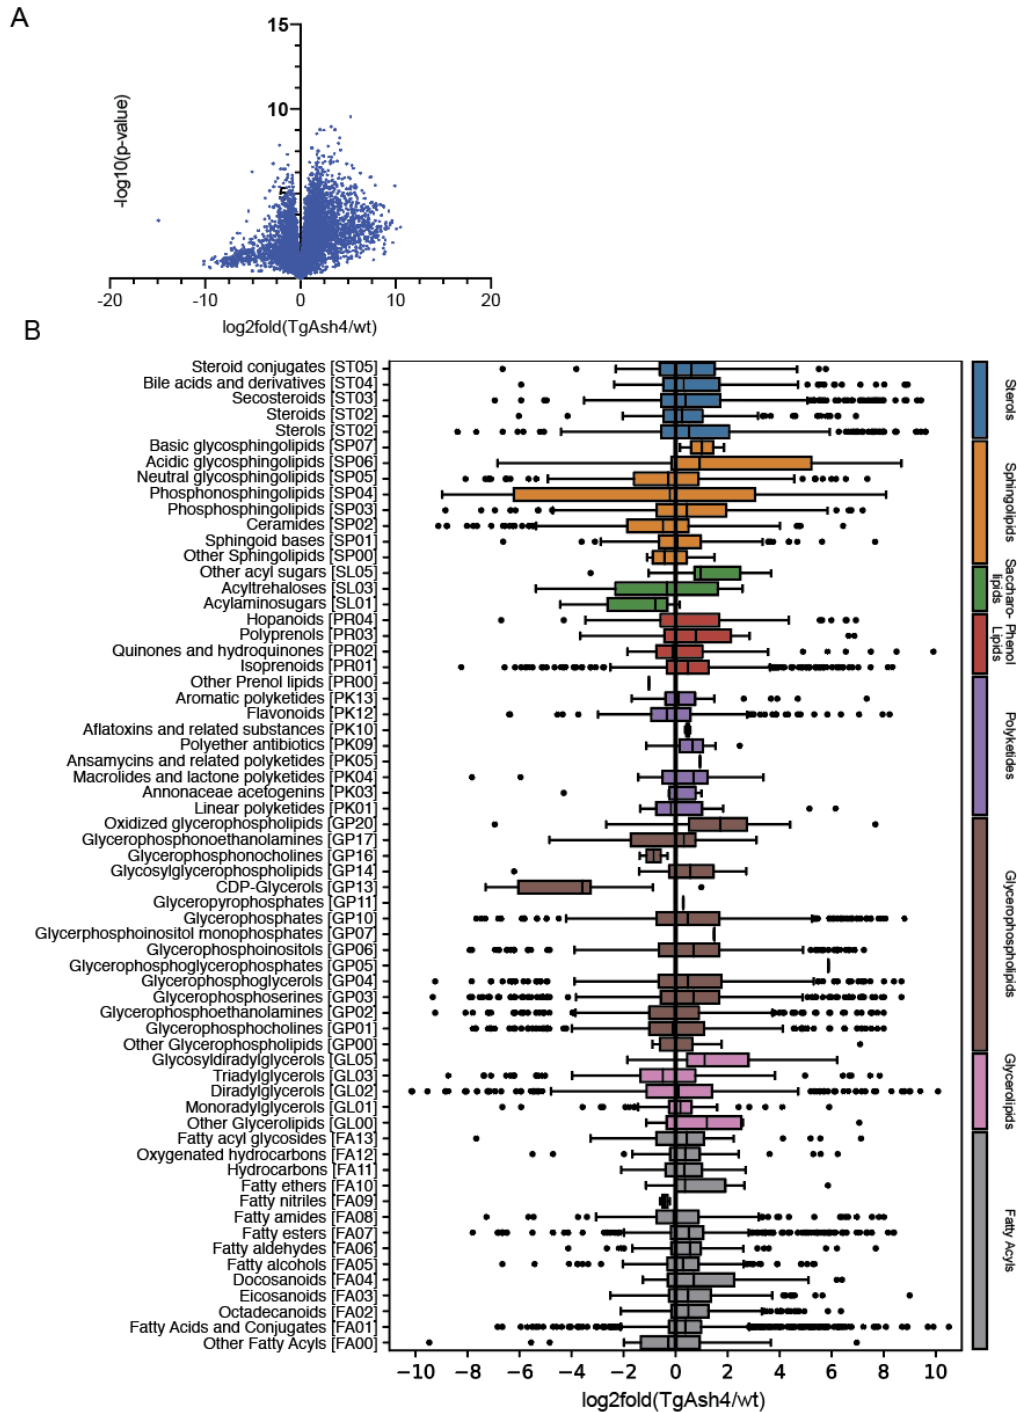

**Supplementary Figure 2. Lipidomic analysis of  $\Delta TgAsh4$  and wild type parasite (related to Figure 4)** Volcano plot showing log scaled mean fold change and adjusted p values for all the lipids resulting from the differential expression analysis between  $\Delta TgASH4$  and wild-type parasites (Figure 4C-E). (B) Box plot diagram highlighting the changes in the overall lipid species distribution in  $\Delta TgASH4$ .

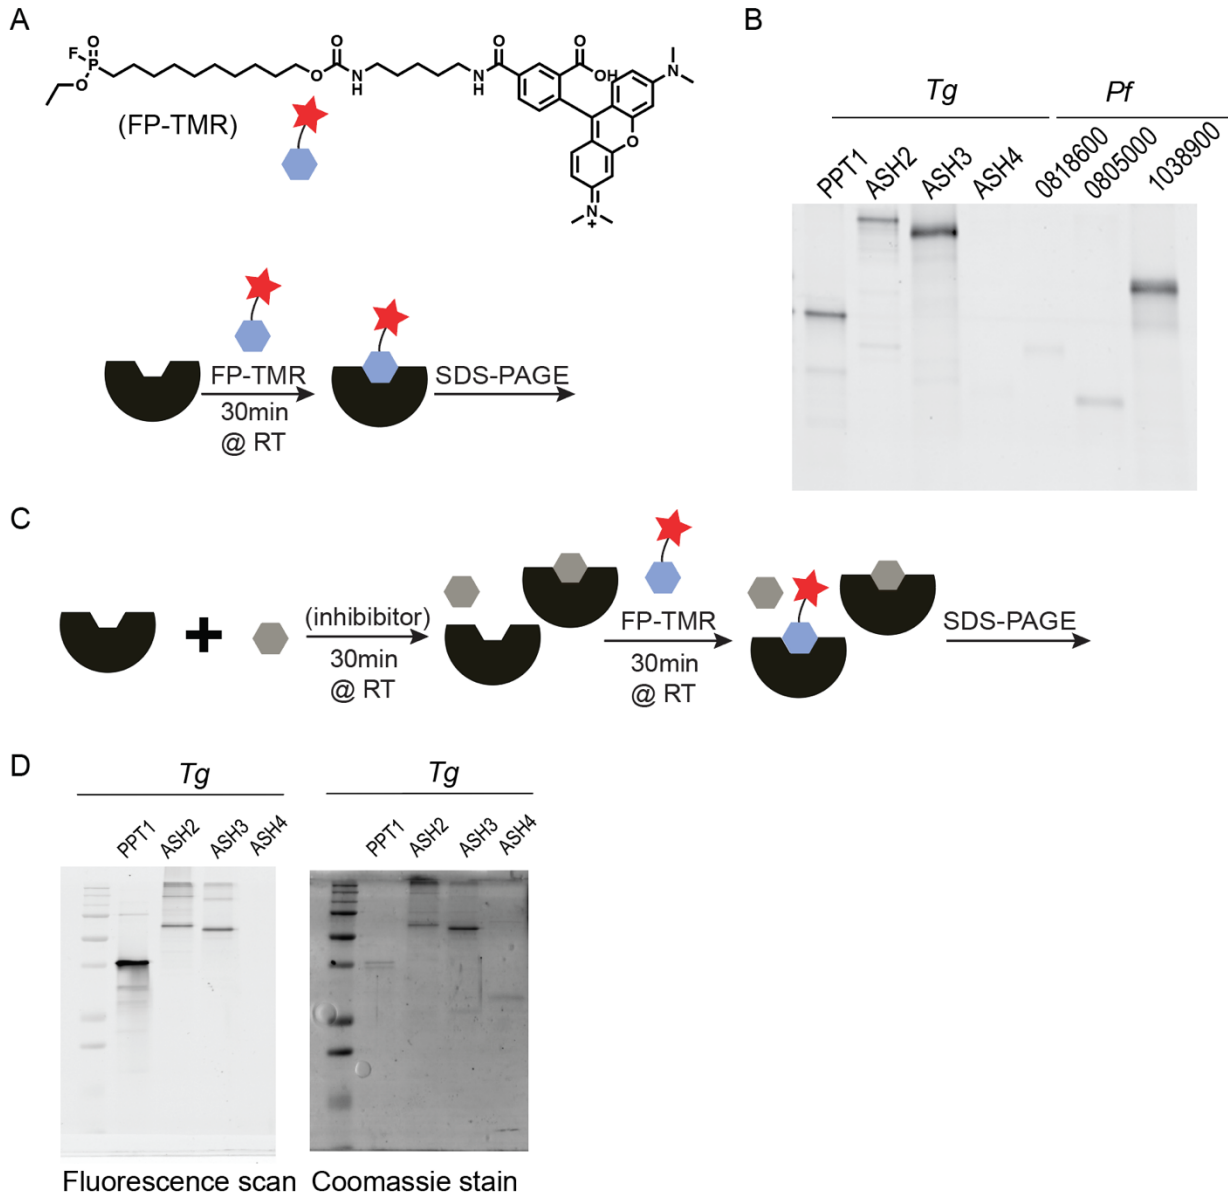

**Supplementary Figure 3. Active site labeling of recombinant serine hydrolases with Fp-TMR. (Related to figure 5).** (A) Structure of FP-TAMRA (upper panel) and schematic showing labeling of the enzymes with FP-TAMRA before analysis of SDS\_PAGE gel (lower panel) (B) SDS-PAGE gel showing the FP-TAMRA labeling of the recombinant *T. gondii* and *P. falciparum* serine hydrolases. (C) Schematic showing the inhibitor screen set using competition labeling with FP-TMR. (D) Gel images of recombinantly expressed and purified TgPPT1, TgASH2, TgASH3 and TgASH4 labeled with FP-TAMRA and analyzed by SDS-PAGE followed by scanning of the gel for fluorescence (Left) or coomassie staining (right) to show purity of the proteins.

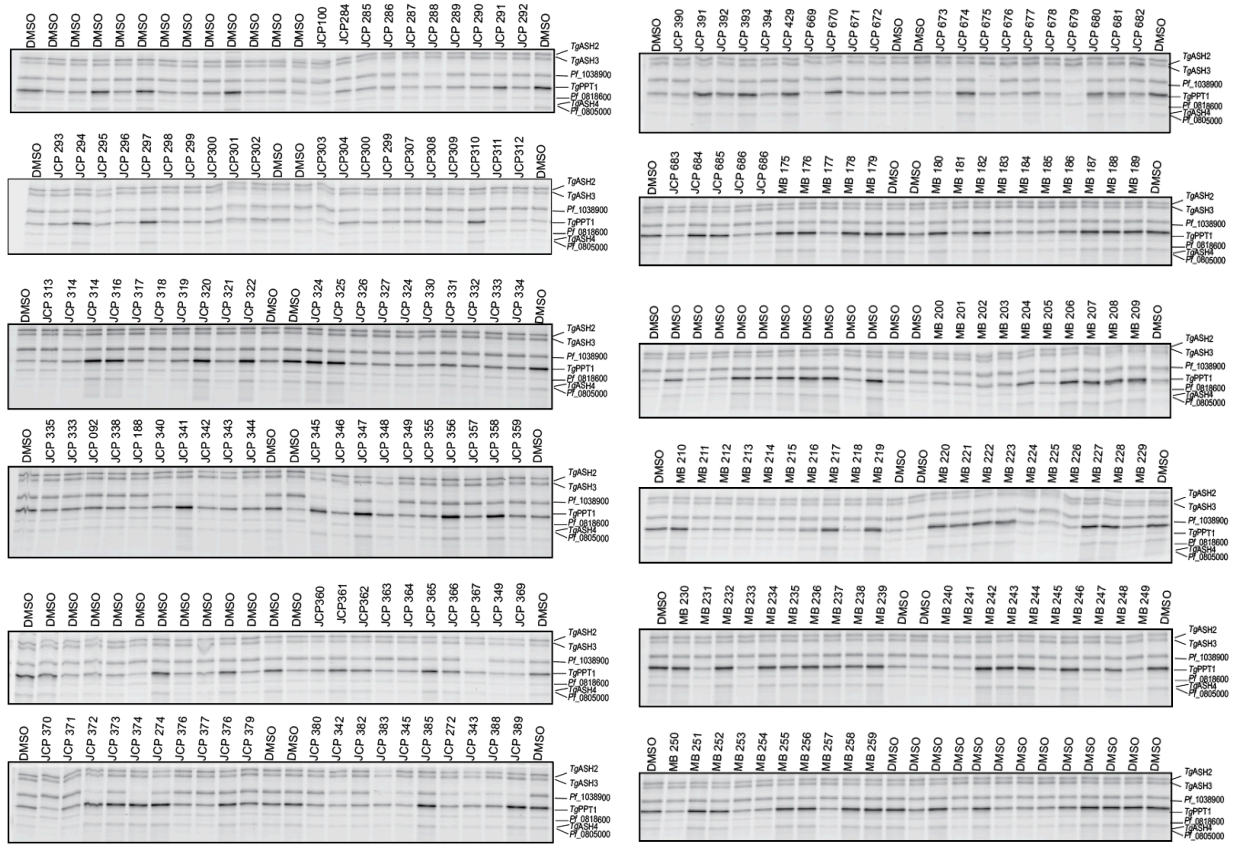

**Supplementary Figure 4. (Related to Figure 5).** SDS-PAGE gel based competitive activity-based protein profiling results showing inhibition of recombinant *T. gondii* and *P. falciparum* serine hydrolases. The enzymes were pooled and pre-incubated with 33 $\mu$ M of serine reactive compounds with and subsequent addition of FP-TAMRA. Competition was assessed using fluorescence intensity of SDS-PAGE gel bands.

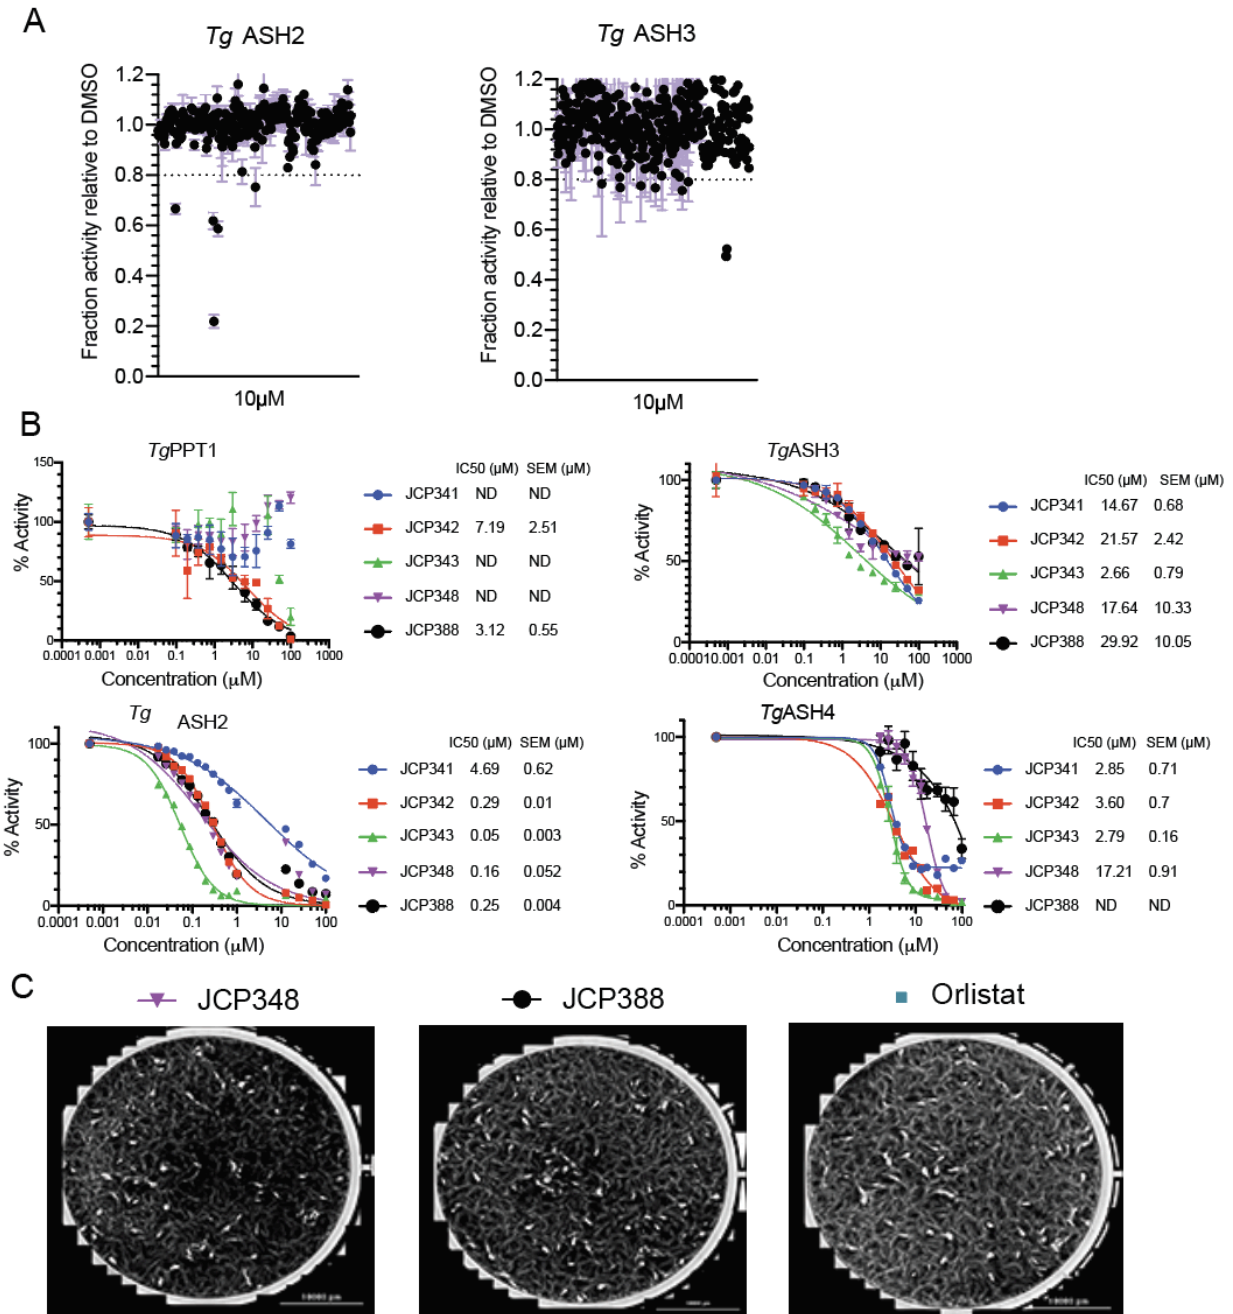

**Supplementary Figure 5. (Related to Figure 6).** (A) Dot plot showing our secondary screen inhibitors using a 4MU-octanote as the substrate (Figure 5B) and (B) Inhibitor validation in vitro and calculation of the IC<sub>50</sub> curves and values of selected compounds (Figure 5B) (C) Inhibitor validation in cell culture infection model using a plaque assay that measures plaque formation by the wild type parasites in presence or absence of JCP341, JCP342, JCP343, JCP348, and Orlistat (Figure 6A, B).

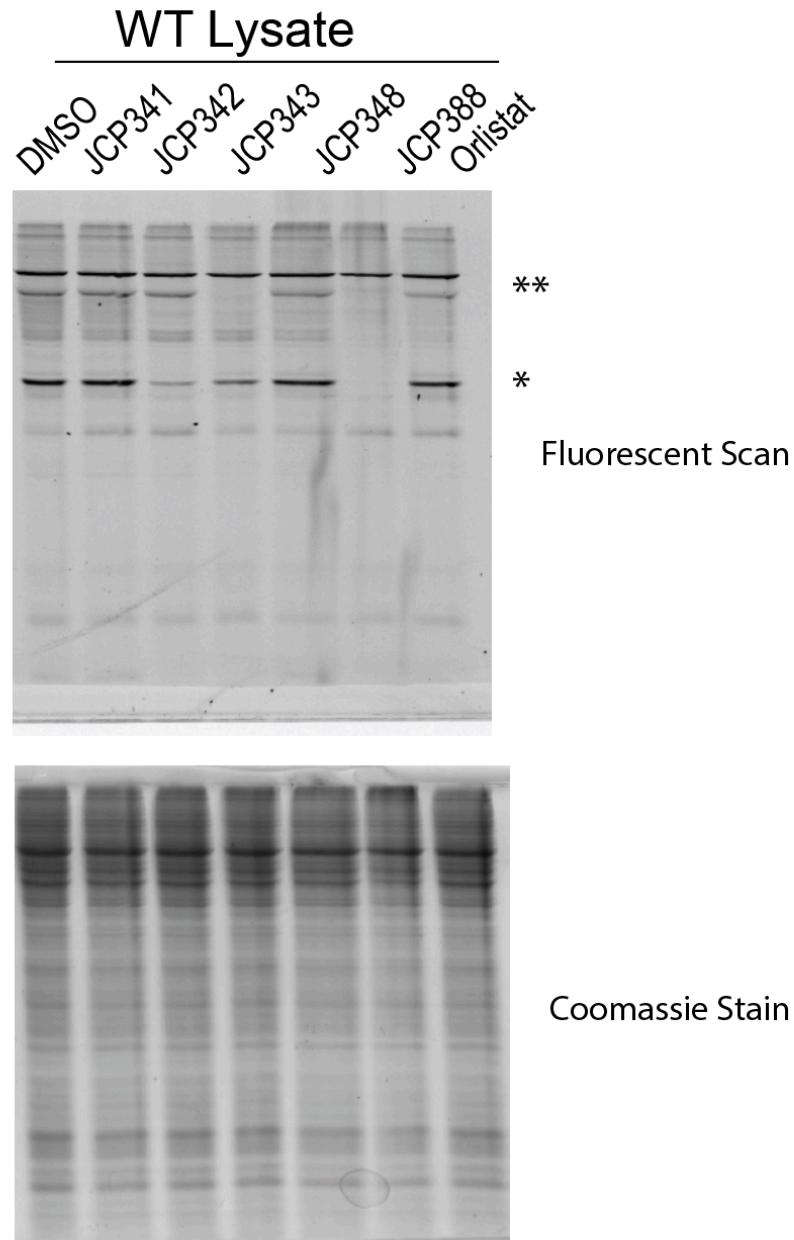

**Supplementary Figure 6. (Related to Figure 5).** ABPP competition of chloroisocoumarins hits targeting TgPPT1 and TgASH2-4 in total parasite lysates. Total detergent lysates from WT parasites were treated with each of the indicated screening hits at a final concentration of 10  $\mu$ M at 37 degrees C. After 30 minutes, samples were labeled for 30 minutes with the FP-TAMRA probe (1 $\mu$ M final concentration) and samples resolved by SDS-PAGE. Images show fluorescent scan (top) and Coomassie stain (bottom) of the resulting gels.

**Table S1. (Related to Figure 1).** List of structural templates used to build homology models of serine hydrolases.

| Enzyme        | structural template | template type               | sequence identity (%) | FFAS score | position of catalytic residues | remarks                                                                                                      |
|---------------|---------------------|-----------------------------|-----------------------|------------|--------------------------------|--------------------------------------------------------------------------------------------------------------|
| <i>TgPPT1</i> |                     |                             |                       |            |                                |                                                                                                              |
|               | 5syn_A              | thioesterase                | 36                    | -83.6      | S128, D221, H263               | analyzed model, position of docked substrate follow exper. position of inhibitor in the template structure** |
|               | 1fj2_A              | thioesterase                | 34                    | -81.9      |                                |                                                                                                              |
|               | 2wtm_A              | EST1E                       | 15                    | -26.8      |                                | not well defined binding pocket                                                                              |
| <i>TgASH2</i> |                     |                             |                       |            |                                |                                                                                                              |
|               | 6imp_A              | RTX toxin, serine hydrolase | 17                    | -65        | S192, D268, H298               | analyzed model**                                                                                             |
|               | 5g59_A              | esterase                    | 17                    | -52.9      |                                | second model**                                                                                               |
|               | 6ii2_A              | putative RTX toxin          | 15                    | -31        |                                | catalytic triad not formed                                                                                   |
| <i>TgASH3</i> |                     |                             |                       |            |                                |                                                                                                              |
|               | 6imp_A              | RTX toxin, serine hydrolase | 16                    | -61.8      | S277, D346, H420               | H420 not modelled, template too short                                                                        |
|               | 5g59_A              | esterase                    | 15                    | -47.2      |                                | analyzed model**                                                                                             |
|               | 6ii2_A              | putative RTX toxin          | 15                    | -29.9      |                                | catalytic triad not formed                                                                                   |
| <i>TgASH4</i> |                     |                             |                       |            |                                |                                                                                                              |
|               | 6imp_A              | RTX toxin, serine hydrolase | 16                    | -66.4      | S124, D188, H217               | position of D188 incorrect                                                                                   |
|               | 5g59_A              | esterase                    | 20                    | -58.8      |                                | analyzed model**                                                                                             |
|               | 2wtm_A              | EST1E                       | 18                    | -37.6      |                                | not well defined binding pocket                                                                              |



**Table S2. (Related to Figure 3).** Kinetic parameters for the processing of lipid ester substrates by the recombinantly expressed hydrolase enzymes.

|                | <b>TgPPT1</b> | Km                | Kcat                | Kcat/Km                       |
|----------------|---------------|-------------------|---------------------|-------------------------------|
|                | Vmax          | ( $\mu\text{M}$ ) | ( $\text{S}^{-1}$ ) | $\text{S}^{-1} \text{M}^{-1}$ |
| <b>4MU(2)</b>  | 60.039        | 79.99             | 0.15                | 1850.91                       |
| <b>4MU(4)</b>  | 51.48         | 12.89             | 0.13                | 9849.13                       |
| <b>4MU(7)</b>  | 19.61         | 153.98            | 0.05                | 314.06                        |
| <b>4MU(8)</b>  | 89.64         | 17.64             | 0.22                | 12531.66                      |
| <b>4MU(10)</b> | 95.61         | 8.99              | 0.24                | 26237.29                      |
|                |               |                   |                     |                               |
|                | <b>TgASH2</b> | Km                | Kcat                | Kcat/Km                       |
|                | Vmax          | ( $\mu\text{M}$ ) | ( $\text{S}^{-1}$ ) | $\text{S}^{-1} \text{M}^{-1}$ |
| <b>4MU(2)</b>  | 129.32        | 62.30             | 0.32                | 5118.56                       |
| <b>4MU(4)</b>  | 62.91         | 12.94             | 0.16                | 11985.77                      |
| <b>4MU(7)</b>  | 31.66         | 3.76              | 0.08                | 20760.34                      |
| <b>4MU(8)</b>  | 14.14         | 3.55              | 0.03                | 9817.55                       |
| <b>4MU(10)</b> | 6.36          | 18.13             | 0.016               | 864.95                        |
|                | <b>TgASH3</b> | Km                | Kcat                | Kcat/Km                       |
|                | Vmax          | ( $\mu\text{M}$ ) | ( $\text{S}^{-1}$ ) |                               |
| <b>4MU(2)</b>  | 158.86        | 77.81             | 0.39                | 5035.15                       |
| <b>4MU(4)</b>  | 53.17         | 21.12             | 0.13                | 6206.71                       |
| <b>4MU(7)</b>  | 10.13         | 61.26             | 0.025               | 407.82                        |
| <b>4MU(8)</b>  | 2.95          | 12.93             | 0.01                | 562.19                        |
| <b>4MU(10)</b> | ND            | ND                | ND                  | ND                            |
|                | <b>TgASH4</b> | Km                | Kcat                | Kcat/Km                       |
|                | Vmax          | ( $\mu\text{M}$ ) | ( $\text{S}^{-1}$ ) | $\text{S}^{-1} \text{M}^{-1}$ |
| <b>4MU(2)</b>  | 138.83        | 108.81            | 0.34                | 3146.42                       |
| <b>4MU(4)</b>  | 42.07         | 33.33             | 0.10                | 3113.17                       |
| <b>4MU(7)</b>  | 6.27          | 59.19             | 0.02                | 261.31                        |
| <b>4MU(8)</b>  | 1.82          | 48.34             | 0.0045              | 92.89                         |
| <b>4MU(10)</b> | ND            | ND                | ND                  | ND                            |
